# Supplementary material for: Quaternary structure of the yeast Arc1p-aminoacyl-tRNA synthetase complex in solution and its compaction upon binding of tRNAs
Source: PubMed Central journal article supplement — Nucleic Acids Res. 2012 Nov 17;41(1):667–76. doi: 10.1093/nar/gks1072 (PMC3592460; doi:10.1093/nar/gks1072), 2012-11-17
Supplement: supp_gks1072_nar-00878-r-2012-File009.pdf [file supp_gks1072_nar-00878-r-2012-File009.pdf]

## SUPPLEMENTARY DATA

Figure S1. Secondary structure prediction done with Network Protein Sequence Analysis Server (43);

A: secondary structure prediction for GluRS: residues 181-205; For the amino acids 181-200 there is a random coil region predicted and for 201-205 an extended strand; B: secondary structure prediction for MetRS: residues 141-210; Amino acids 160-172 are a random coil region, 173-175 an extended strand and 176-195 are again a random coil region.

A

|            | 150                  | 160                  | 170                    | 180                  | 190                  | 200        | 210 |
|------------|----------------------|----------------------|------------------------|----------------------|----------------------|------------|-----|
|            |                      |                      |                        |                      |                      |            |     |
| UNK_208330 | KVDVNVSRWYTLLEMDPIFG | EAHDFLSKSLLELKKSANV  | GKKKETHKANFEIDLPDA     | KMG                  | EVVTRFPPEP           |            |     |
| DSC        | ccccccchh            | cccccccc             | hhhhhhhhhhhhhhhhhh     | cccccccccccccccccccc | cccccccccccccccccccc | eeeecccccc |     |
| MLRC       | ccccchhhhhhhhh       | ccccchhhhhhhhhhhhh   | hhhhhhhhhhhhhhhhhh     | cccccccccccccccccccc | eeeecccccccccccccccc | eeeecccccc |     |
| PHD        | ccchhhhhhhheeee      | cccccccccccccccccccc | cccccccccccccccccccc   | cccccccccccccccccccc | cccccccccccccccccccc | eeeecccccc |     |
| Predator   | hcccccccccccccccc    | cccccccccccccccccccc | hhhhhhhhhhhhhhhh       | ccccchhhhhhh         | cccccccccccccccccccc | eeeecccccc |     |
| Sec.Cons.  | cccc??hhheeecccc     | ??h??hhhhhhhhhhhh    | ??cccccccccccccccccccc | cccccccccccccccccccc | eeeecccccc           |            |     |

B

|            | 150                 | 160                    | 170                      | 180                  | 190                  | 200        | 210 |
|------------|---------------------|------------------------|--------------------------|----------------------|----------------------|------------|-----|
|            |                     |                        |                          |                      |                      |            |     |
| UNK_228150 | KFPELPSKVVHNAVALAKK | HVPERDSSSFKNIGAVKI     | QADLTVKPKDSEILEPKP       | NERNILIT             | SALFYVNNVP           |            |     |
| DSC        | ccccchhhhhhhhhhh    | cccccccccccccccccccc   | hhhhhhheeehhhh           | cccccccccccccccccccc | eeeecccccccccccccccc | eeeecccccc |     |
| MLRC       | chhhhhhhhhhhhhhh    | cccccccccccccccccccc   | eeeecccccccccccccccc     | cccccccccccccccccccc | eeeecccccccccccccccc | eeeecccccc |     |
| PHD        | hcchhhhhhhhh        | cccccccccccccccccccc   | eeeecccccccccccccccc     | cccccccccccccccccccc | eeeecccccccccccccccc | eeeecccccc |     |
| Predator   | ccccccccchhhhhhhhh  | cccccccccccccccccccc   | hhhhhhhh                 | cccccccccccccccccccc | eeeecccccccccccccccc | eeeecccccc |     |
| Sec.Cons.  | ccc??hhhhhhhhhhhh   | ??cccccccccccccccccccc | eeee????cccccccccccccccc | eeeecccccc           |                      |            |     |

Figure S2. Guinier plots of experimental scattering data;  
1: Pentameric complex MetRS:GluRS:Arc1p:tRNAs (grey); 2: Trimeric complex of MetRS:GluRS:Arc1p (turquoise); 3: GluRS:Arc1p (lilac); 4: MetRS:Arc1p complex (yellow); 5: GluRS (red); 6: MetRS (blue); 7: Arc1p (green).

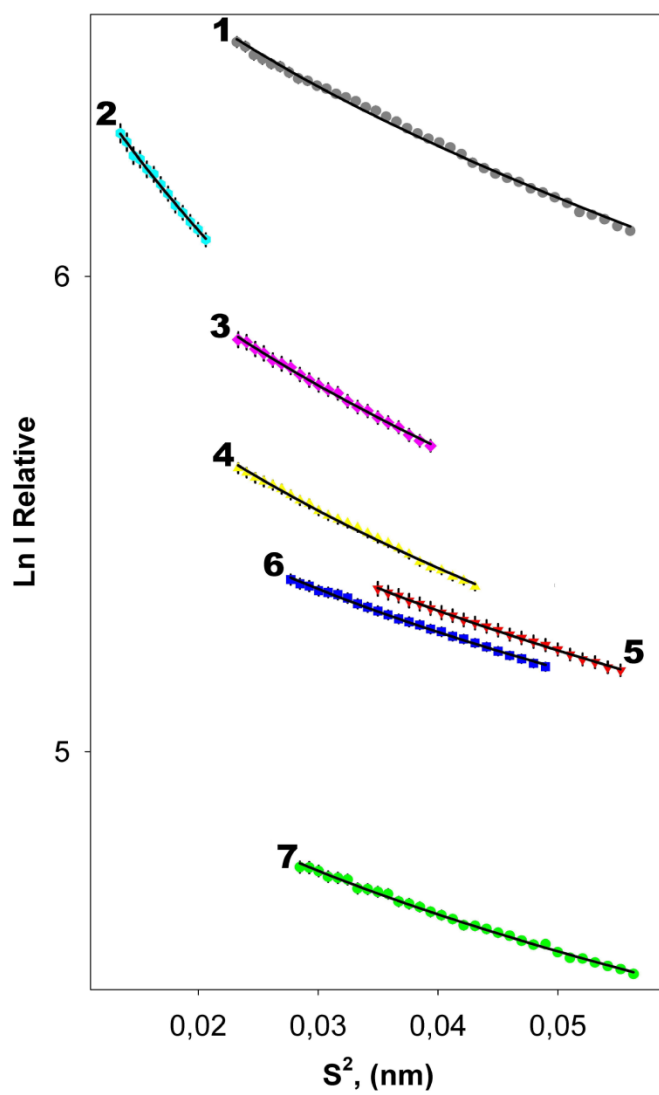

Figure S3. *Ab initio* Models;

A: GluRS (red), B: MetRS (blue), C: Arc1p (green), D: trimeric complex and E: pentameric complex

The models were obtained by analyzing the SAXS data with the Program DAMMIN. Proteins are shown with densely packed beads.

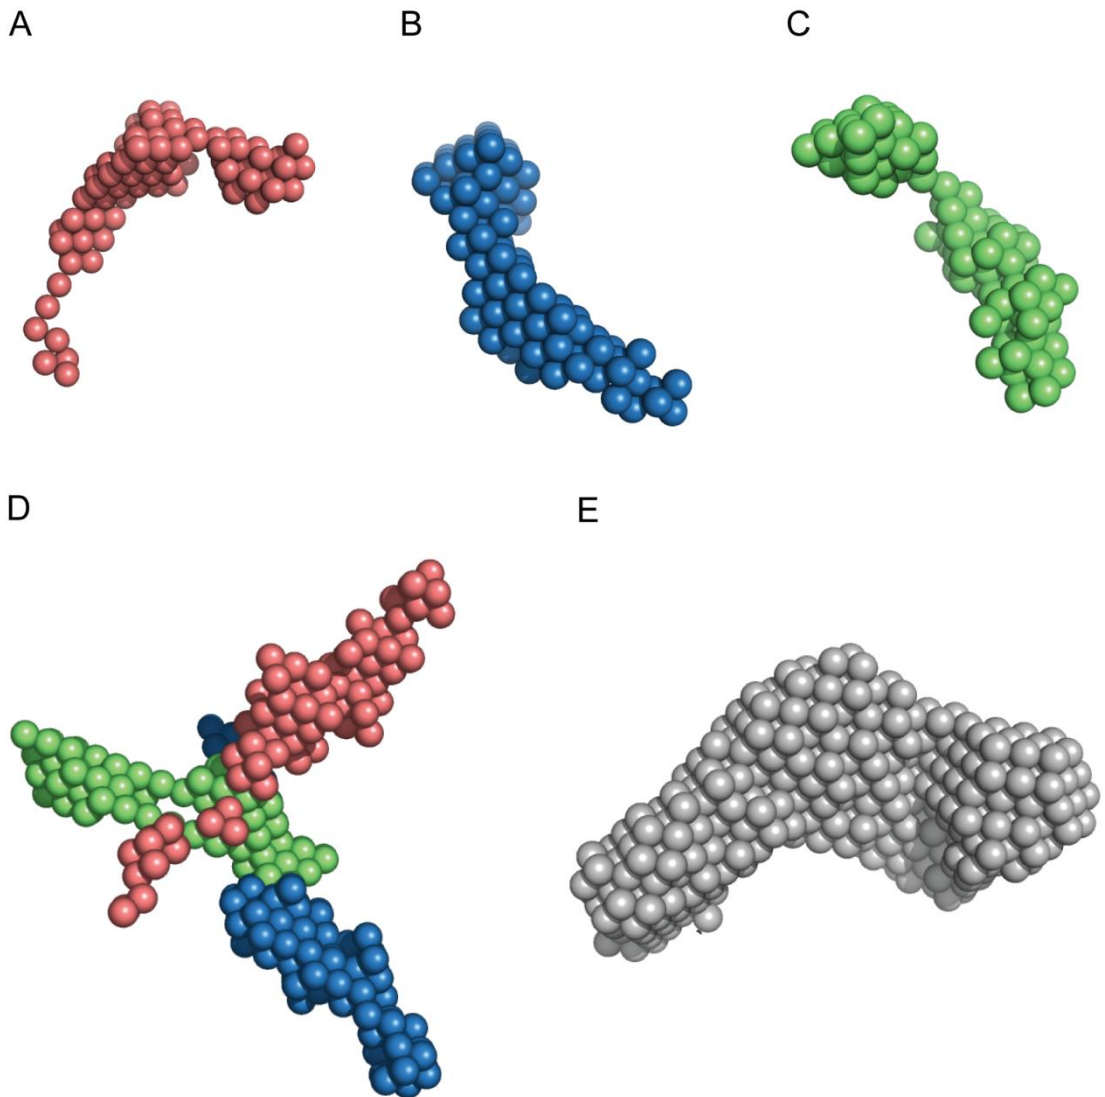

## SUPPLEMENTARY METHODS

### EMSA assay

To analyze the binding of the tRNAs to the trimeric complex, the trimeric complex (MAG) was used in a 10  $\mu$ M concentration (1  $\mu$ l) in a total reaction volume of 20  $\mu$ l. Each unlabeled tRNA was applied in a 1:1 molar ratio to the complex as the highest concentration (1.5  $\mu$ l). The  $^{32}$ P labeled tRNAs were added in the same concentration steps (0.5-1.5  $\mu$ l) as the unlabeled ones (Figure 3). The reactions were incubated on ice for 30 minutes and then loaded on a 6% native gel.

### SUPPLEMENTARY REFERENCES

43. Combet,C., Blanchet,C., Geourjon,C. and Deléage,G. (2000) NPS@: network protein sequence analysis. *Trends Biochem Sci.*, **25**, 147-50.
44. Simader,H. and Suck,D. (2006) Expression, purification, crystallization and preliminary phasing of the heteromerization domain of the tRNA-export and aminoacylation cofactor Arc1p from yeast. *Acta. Crystallograph Sect. F: Struct. Biol. Cryst. Commun.*, **62**, 346-349.
